# Supplementary material for: Liraglutide restores impaired associative learning in individuals with obesity
Source: PubMed Central journal article supplement (PMC10447249; doi:10.1038/s42255-023-00859-y), 2023-08-17
Supplement: 42255_2023_859_MOESM3_ESM.pdf [file 42255_2023_859_MOESM3_ESM.pdf]

### Supplemental Table 1. Learning model parameters

A: Sensory Prediction Error - effect of group (IS+ vs. IS-) on the sensory prediction error under placebo conditions

|       | <i>df</i> | <i>t</i> | <i>p</i> |  | Cohen's <i>d</i> |
|-------|-----------|----------|----------|--|------------------|
| group | 332.82    | -0.0085  | 0.9932   |  | -9.35e-04        |

Note. Welch two-sided two-sample *t*-test, *df* = degrees of freedom

B: Adaptive Learning Rate - effect of group (IS+ vs IS-) on the adaptive learning rate under placebo conditions

|       | <i>df</i> | <i>t</i> | <i>p</i> |   | Cohen's <i>d</i> |
|-------|-----------|----------|----------|---|------------------|
| group | 98.842    | 2.2425   | 0.02716  | * | 0.44             |

Note. Welch two-sided two-sample *t*-test, *df* = degrees of freedom

C: Adaptive Prediction Error - effect of group (IS+ vs IS-) on the adaptive prediction error under placebo conditions

|       | <i>df</i> | <i>t</i> | <i>p</i> |   | Cohen's <i>d</i> |
|-------|-----------|----------|----------|---|------------------|
| group | 321.03    | 2.5003   | 0.01291  | * | 0.28             |

Note. Welch two-sided two-sample *t*-test, *df* = degrees of freedom

D: Sensory Prediction Error – no significant effect of group (IS+ vs IS-) or intervention (placebo vs liraglutide) on sensory prediction error detectable (Model M1)

|                        | Sum Sq  | Mean Sq | NumDF | DenDF | <i>F</i>  | <i>p</i> |     | Cohen's <i>f</i><br>(partial) |
|------------------------|---------|---------|-------|-------|-----------|----------|-----|-------------------------------|
| group                  | 0.0052  | 0.0052  | 1     | 656   | 1.184     | 0.277    |     | 0.04                          |
| int                    | 0.0052  | 0.0052  | 1     | 656   | 1.1991    | 0.274    |     | 0.04                          |
| pred                   | 10.5758 | 10.5758 | 1     | 656   | 2424.2537 | < 0.001  | *** | 1.92                          |
| correct                | 0.0384  | 0.0384  | 1     | 656   | 8.8034    | 0.003    | **  | 0.12                          |
| group:int              | 0.0004  | 0.0004  | 1     | 656   | 0.0952    | 0.758    |     | 0.01                          |
| group:pred             | 0.0048  | 0.0048  | 1     | 656   | 1.0996    | 0.295    |     | 0.04                          |
| int:pred               | 0.002   | 0.002   | 1     | 656   | 0.4518    | 0.502    |     | 0.03                          |
| group:correct          | 0.0001  | 0.0001  | 1     | 656   | 0.0139    | 0.906    |     | 4.61e-03                      |
| int:correct            | 0.0001  | 0.0001  | 1     | 656   | 0.0313    | 0.860    |     | 6.91e-03                      |
| pred:correct           | 0.212   | 0.212   | 1     | 656   | 48.6045   | < 0.001  | *** | 0.27                          |
| group:int:pred         | 0       | 0       | 1     | 656   | 0         | 0.998    |     | 7.12e-05                      |
| group:int:correct      | 0.0051  | 0.0051  | 1     | 656   | 1.1586    | 0.282    |     | 0.04                          |
| group:pred:correct     | 0.0002  | 0.0002  | 1     | 656   | 0.0411    | 0.839    |     | 7.92e-03                      |
| int:pred:correct       | 0.002   | 0.002   | 1     | 656   | 0.453     | 0.501    |     | 0.03                          |
| group:int:pred:correct | 0.0071  | 0.0071  | 1     | 656   | 1.6162    | 0.204    |     | 0.05                          |

Note. Type III Analysis of Variance Table with Satterthwaite's method based on a mixed effect model; NumDF = degrees of freedom in the numerator, DenDF = degrees of freedom in the denominator, int = intervention; pred = predictability of the trial, correct = correctness of a subject's choice

*E: Learning rate - effect of intervention (placebo vs GLP-1) on the learning rate depends on group (IS+ vs IS-; Model M2)*

|                                                      |   |             | Sum Sq   | Mean Sq | NumDF | DenDF  | F       | p       |     | Cohen's f (partial) |
|------------------------------------------------------|---|-------------|----------|---------|-------|--------|---------|---------|-----|---------------------|
| group                                                |   |             | 0.155    | 0.155   | 1     | 57.8   | 1.0933  | 0.300   |     | 0.14                |
| int                                                  |   |             | 0.0739   | 0.0739  | 1     | 626.22 | 0.5211  | 0.471   |     | 0.03                |
| pred                                                 |   |             | 13.1702  | 13.1702 | 1     | 622.92 | 92.9226 | < 0.001 | *** | 0.39                |
| group:int                                            |   |             | 2.0541   | 2.0541  | 1     | 626.22 | 14.4928 | < 0.001 | *** | 0.15                |
| Posthoc Analysis of group x intervention interaction |   |             |          |         |       |        |         |         |     |                     |
|                                                      |   |             | estimate | SE      | df    |        | t       | p       |     |                     |
| IS+ Placebo                                          | - | IS- Placebo | 0.3732   | 0.1736  | 44    |        | 2.149   | 0.154   |     |                     |
| IS+ Placebo                                          | - | IS+ GLP-1   | 0.1499   | 0.0466  | 640   |        | 3.215   | 0.007   | **  |                     |
| IS+ Placebo                                          | - | IS- GLP-1   | 0.0587   | 0.174   | 44.3  |        | 0.337   | 0.987   |     |                     |
| IS- Placebo                                          | - | IS+ GLP-1   | -0.2233  | 0.1733  | 43.7  |        | -1.288  | 0.575   |     |                     |
| IS- Placebo                                          | - | IS- GLP-1   | -0.3145  | 0.0485  | 641.2 |        | -6.481  | < 0.001 | *** |                     |
| IS+ GLP-1                                            | - | IS- GLP-1   | -0.0912  | 0.1737  | 44    |        | -0.525  | 0.952   |     |                     |
| group:pred                                           |   |             | 0.0731   | 0.0731  | 1     | 622.92 | 0.5154  | 0.473   |     | 0.03                |
| int:pred                                             |   |             | 0.0138   | 0.0138  | 1     | 622.92 | 0.0973  | 0.755   |     | 0.01                |
| group:int:pred                                       |   |             | 0.1602   | 0.1602  | 1     | 622.92 | 1.1303  | 0.288   |     | 0.04                |

*Note.* Type III Analysis of Variance Table with Satterthwaite's method based on a mixed effect model; Posthoc-analysis was calculated using the Tukey's procedure; NumDF = degrees of freedom in the numerator, DenDF = degrees of freedom in the denominator, int = intervention; pred = predictability of the trial, correct = correctness of a subject's choice, SE = standard error, df = degrees of freedom.

*F: Adaptive Prediction Error – effect of intervention (placebo vs liraglutide) on the adaptive prediction error depends on group (IS+ vs IS–; Model M3)*

|                                                      | Sum Sq   | Mean Sq | NumDF | DenDF  | F        | p       |     | Cohen's f (partial) |
|------------------------------------------------------|----------|---------|-------|--------|----------|---------|-----|---------------------|
| group                                                | 0.384    | 0.384   | 1     | 121.51 | 3.0184   | 0.085   |     | 0.16                |
| int                                                  | 0.206    | 0.206   | 1     | 620.23 | 1.6183   | 0.204   |     | 0.05                |
| pred                                                 | 40.425   | 40.425  | 1     | 614.69 | 318.0383 | < 0.001 | *** | 0.72                |
| correct                                              | 0.836    | 0.836   | 1     | 614.95 | 6.5789   | 0.010   | *   | 0.10                |
| group:int                                            | 0.733    | 0.733   | 1     | 620.23 | 5.7658   | 0.017   | *   | 0.10                |
| Posthoc Analysis of group : intervention interaction |          |         |       |        |          |         |     |                     |
|                                                      | estimate | SE      | df    | t      | p        |         |     |                     |
| IS+ Placebo - IS- Placebo                            | 0.2143   | 0.1037  | 48.6  | 2.066  | 0.179    |         |     |                     |
| IS+ Placebo - IS+ GLP-1                              | 0.0915   | 0.0436  | 649.1 | 2.098  | 0.155    |         |     |                     |
| IS+ Placebo - IS- GLP-1                              | 0.0318   | 0.1043  | 49.5  | 0.305  | 0.990    |         |     |                     |
| IS- Placebo - IS+ GLP-1                              | -0.1228  | 0.1033  | 47.8  | -1.189 | 0.637    |         |     |                     |
| IS- Placebo - IS- GLP-1                              | -0.1826  | 0.0454  | 650.8 | -4.025 | < 0.001  | ***     |     |                     |
| IS+ GLP-1 - IS- GLP-1                                | -0.0598  | 0.1038  | 48.8  | -0.576 | 0.939    |         |     |                     |
| group:pred                                           | 0.269    | 0.269   | 1     | 614.69 | 2.1132   | 0.146   |     | 0.06                |
| int:pred                                             | 0.054    | 0.054   | 1     | 614.69 | 0.4221   | 0.516   |     | 0.03                |
| group:correct                                        | 0.06     | 0.06    | 1     | 614.95 | 0.4687   | 0.494   |     | 0.03                |
| int:correct                                          | 0.047    | 0.047   | 1     | 614.96 | 0.3714   | 0.542   |     | 0.02                |
| pred:correct                                         | 0.029    | 0.029   | 1     | 614.87 | 0.2278   | 0.633   |     | 0.02                |
| group:int:pred                                       | 0.107    | 0.107   | 1     | 614.69 | 0.8409   | 0.359   |     | 0.04                |
| group:int:correct                                    | 0.01     | 0.01    | 1     | 614.96 | 0.0749   | 0.784   |     | 0.01                |
| group:pred:correct                                   | 0.007    | 0.007   | 1     | 614.87 | 0.0571   | 0.811   |     | 9.63e-03            |
| int:pred:correct                                     | 0.018    | 0.018   | 1     | 614.88 | 0.1392   | 0.709   |     | 0.02                |
| group:int:pred:correct                               | 0.024    | 0.024   | 1     | 614.88 | 0.1914   | 0.661   |     | 0.02                |

*Note.* Type III Analysis of Variance Table with Satterthwaite's method based on a mixed effect model; Posthoc-analysis was calculated using the Tukey's procedure; NumDF = degrees of freedom in the numerator, DenDF = degrees of freedom in the denominator, int = intervention; pred = predictability of the trial, correct = correctness of a subject's choice, SE = standard error, df = degrees of freedom.
