# Supplementary material for: Liraglutide restores impaired associative learning in individuals with obesity
Source: PubMed Central journal article supplement (PMC10447249; doi:10.1038/s42255-023-00859-y), 2023-08-17
Supplement: 42255_2023_859_MOESM4_ESM.pdf [file 42255_2023_859_MOESM4_ESM.pdf]

**Supplementary Table S2.** Neural tracking of the adaptive prediction error

|                    | Cluster level         |      | Peak level |     |     |     |
|--------------------|-----------------------|------|------------|-----|-----|-----|
|                    | $p_{\text{FWE-corr}}$ | Size | $t$        | $x$ | $y$ | $z$ |
| <b>Conjunction</b> |                       |      |            |     |     |     |
| Putamen            | > 0.001               | 2740 | 5.93       | 32  | -10 | 4   |
| NAc                |                       |      | 5.13       | 8   | 10  | -10 |
| mid Insula         |                       |      | 4.58       | -40 | 0   | 8   |
| vmPFC              | > 0.001               | 1371 | 4.32       | 8   | 34  | -2  |
| vmPFC              |                       |      | 3.96       | 6   | 44  | -8  |

*Note.* Statistics for  $T$ -contrasts identifying brain regions, which encode the adaptive prediction error. A conjunction analysis of the four regressors IS+placebo, IS+GLP-1, IS–placebo, and IS–GLP-1 was applied. Statistical threshold was  $p < .05$ , FWE-corrected at cluster level, with underlying voxel-level threshold of  $p < 0.001$ . vmPFC = ventromedial prefrontal cortex; NAc = nucleus accumbens.
