# Supplementary material for: Liraglutide restores impaired associative learning in individuals with obesity
Source: PubMed Central journal article supplement (PMC10447249; doi:10.1038/s42255-023-00859-y), 2023-08-17
Supplement: 42255_2023_859_MOESM5_ESM.pdf [file 42255_2023_859_MOESM5_ESM.pdf]

**Supplementary Table S3.** Standardized dinner the evening prior to the testing day.

| <b>Item</b>     | <b>Amount</b>          | <b>kcal</b> | <b>Fat(g)</b> | <b>CH(g)</b> | <b>Protein (g)</b> |
|-----------------|------------------------|-------------|---------------|--------------|--------------------|
| <i>Bread</i>    | 2 slices , 50 g each   | 241         | 2.7           | 45           | 7.5                |
| <i>Cheese</i>   | Slices à 17g           | 321         | 24            | 0.3          | 26                 |
| <i>Salami</i>   | Slices à 18g           | 306         | 25            | 1            | 19                 |
| <i>Butter</i>   | 16.7 g                 | 743         | 82            | 0.6          | 0.7                |
| <i>Tomato</i>   | 2 small tomatoes       |             |               |              |                    |
| <i>Cucumber</i> | 5 slices               |             |               |              |                    |
| <i>Fruit</i>    |                        |             |               |              |                    |
| <i>Yoghurt</i>  | 1 yoghurt à 150g       | 143         | 4.2           | 21.8         | 4.5                |
| <i>Fruit</i>    | 1 small Apple          | 55          | 0.60          | 11           | 0.3                |
| <i>Drinks</i>   | Water at free disposal |             |               |              |                    |

Note. Kcal, fat, CH, protein content per 100g are displayed, CH = Carbohydrates
